Correction

## Correction: Melanoma cell therapy: Endothelial progenitor cells as shuttle of the MMP12 uPAR-degrading enzyme

Anna Laurenzana<sup>1</sup>, Alessio Biagioni<sup>1</sup>, Silvia D'Alessio<sup>2</sup>, Francesca Bianchini<sup>1</sup>, Anastasia Chillà<sup>1</sup>, Francesca Margheri<sup>1</sup>, Cristina Luciani<sup>1</sup>, Benedetta Mazzanti<sup>3</sup>, Nicola Pimpinelli<sup>4</sup>, Eugenio Torre<sup>1</sup>, Silvio Danese<sup>2</sup>, Lido Calorini<sup>1</sup>, Mario Del Rosso<sup>1,5</sup> and Gabriella Fibbi<sup>1,5</sup>

<sup>1</sup>Department of Experimental and Clinical Biomedical Science, University of Florence, Italy

<sup>2</sup>IBD Center, Humanitas Clinical and Research Center Rozzano (Mi), Italy

<sup>3</sup>Cord Blood Bank, Careggi University Hospital, Florence, Italy

<sup>4</sup>Clinical, Preventive and Oncologic Dermatology Section, Department of Surgery and Translational Medicine, University of Florence, Italy

<sup>5</sup>ITT, Istituto Toscano Tumori

**Published:**

**Copyright:** © 2021 Laurenzana et al. This is an open access article distributed under the terms of the [Creative Commons Attribution License](#) (CC BY 3.0), which permits unrestricted use, distribution, and reproduction in any medium, provided the original author and source are credited.

**This article has been corrected:** In Figure 6D, the 3rd panel in the 2nd column contains an accidental overlap of the 1st panel in the 1st column. The corrected Figure 6, produced using the original data, is shown below. The authors declare that these corrections do not change the results or conclusions of this paper.

Original article: Oncotarget. 2014; 5:3711–3727. <https://doi.org/10.18632/oncotarget.1987>

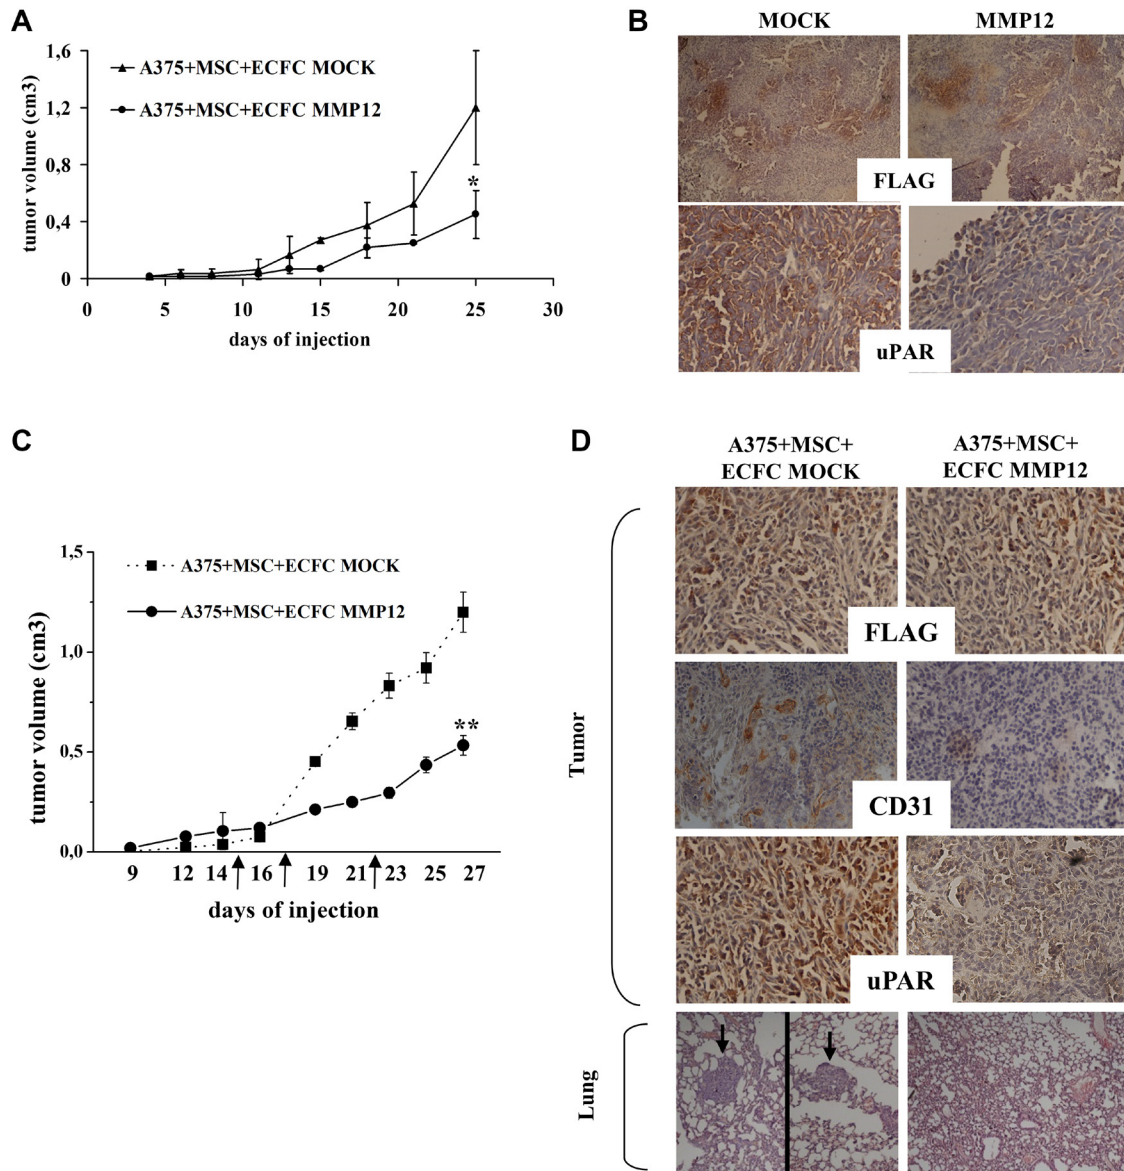

**Figure 6: The *in vivo* effect of MMP12-engineered ECFC on tumor growth and metastasis.** (A) Melanoma tumors were obtained by subcutaneous injection of  $1 \times 10^6$  viable A375 cells together with  $0.5 \times 10^6$  MSCs in the flanks of 6-week-old nude nu/nu (CD-1) and, when tumor mass was evident, mice were treated by i.v. injection with ECFC-MOCK or ECFC-MMP12, as described in materials and methods. The days of injection are depicted on the chart using big arrows. Effect of ECFC-MMP12 on *in vivo* tumor growth. Mixture of A375 melanoma cells and MSC were co-injected together with ECFC-MOCK or ECFC-MMP12 in nude mice. Tumor development was monitored for 25 days, by measuring tumor diameter, and then mice were sacrificed. *Asterisks indicate* significant difference ( $*P < 0.05$ ) from control. (B) uPAR and Flag levels assessed by immunohistochemistry in tumor tissue from mice treated as indicated in A and collected at the end of the experiment, as described in results section. These results are representative of 3 different experiments performed in triplicate that gave similar results (magnification:  $\times 100$  in the upper panels and  $\times 400$  in the lower panels). (C) Tumor growth curve was obtained by measuring tumor diameters at regular intervals. Eight mice were used for each experimental condition. Statistical analysis was carried out by Student's *t*-test and significant differences between the two groups were indicated by the *asterisks* ( $**P < 0.001$  from control ECFC-MOCK). (D) Histological analysis of the tumors and lungs recovered at autopsy as described in the text. Tumor slides were performed according to standard procedures and incubated with a primary antibody against CD31, uPAR and FLAG (see Materials and Methods) followed by a peroxidase-conjugated IgG preparation; 3,3'-diaminobenzidine was used as the chromogen for development. Slides were counterstained with aqueous Meyer hematoxylin, mounted with glycerol for visual inspection and examined under bright field microscope. Lungs were stained with hematoxylin-eosin. Metastases (depicted using big arrows) in the image of mouse injected with ECFC MOCK come from two different slides of the same lung. Pictures are representative of four randomly chosen microscopic fields (magnification:  $\times 400$ ).
